# Supplementary material for: Discovery of Antifungal and Biofilm Preventative Compounds from Mycelial Cultures of a Unique North American Hericium sp. Fungus
Source: PubMed Central journal article supplement (PMC7070493; doi:10.3390/molecules25040963), 2020-02-20
Supplement: molecules-25-00963-s001.pdf [file molecules-25-00963-s001.pdf]

## Supplementary data

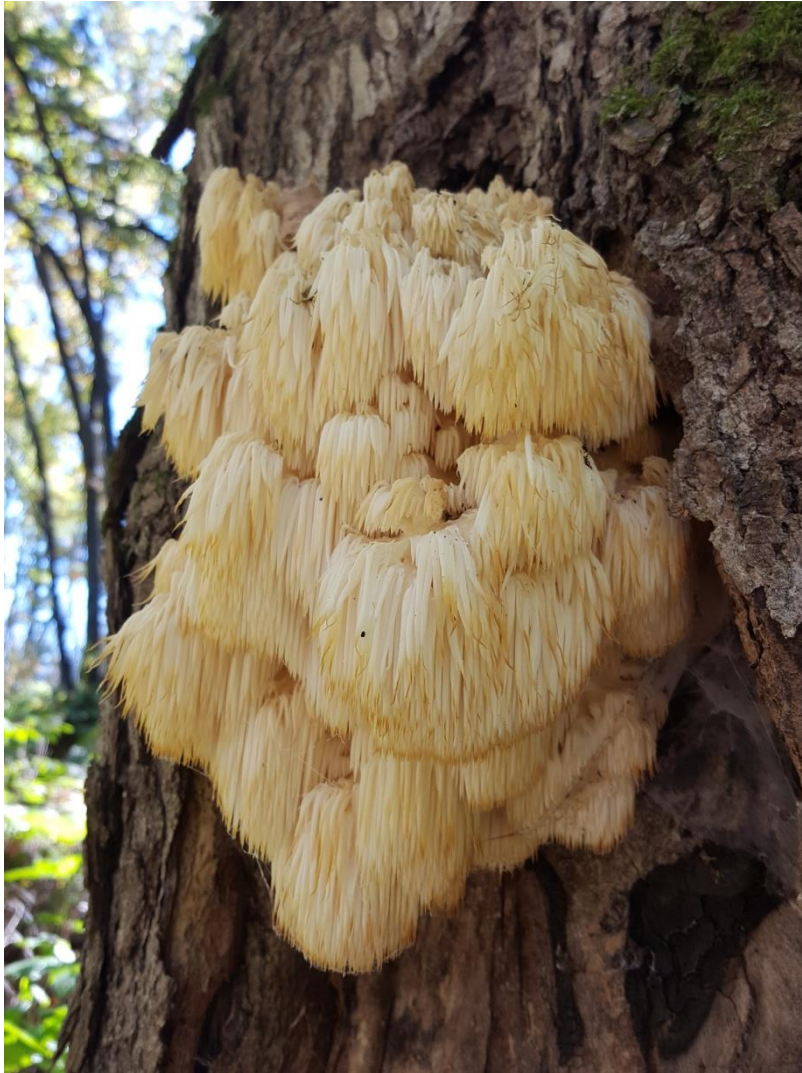

Figure S1. The picture of *Hericium* sp. WBSP8.

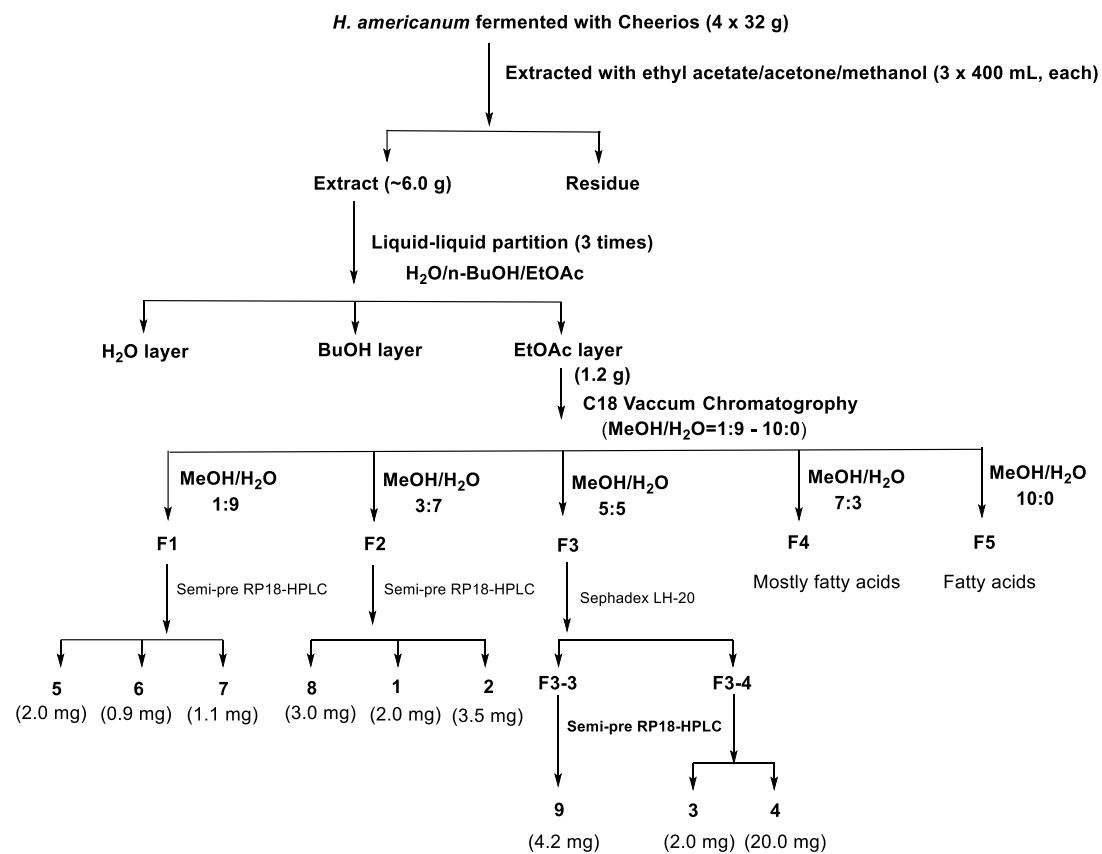

Figure S2. Flow diagram of extraction and isolation procedure of compounds 1-9 as described in detail in the Materials and Methods.

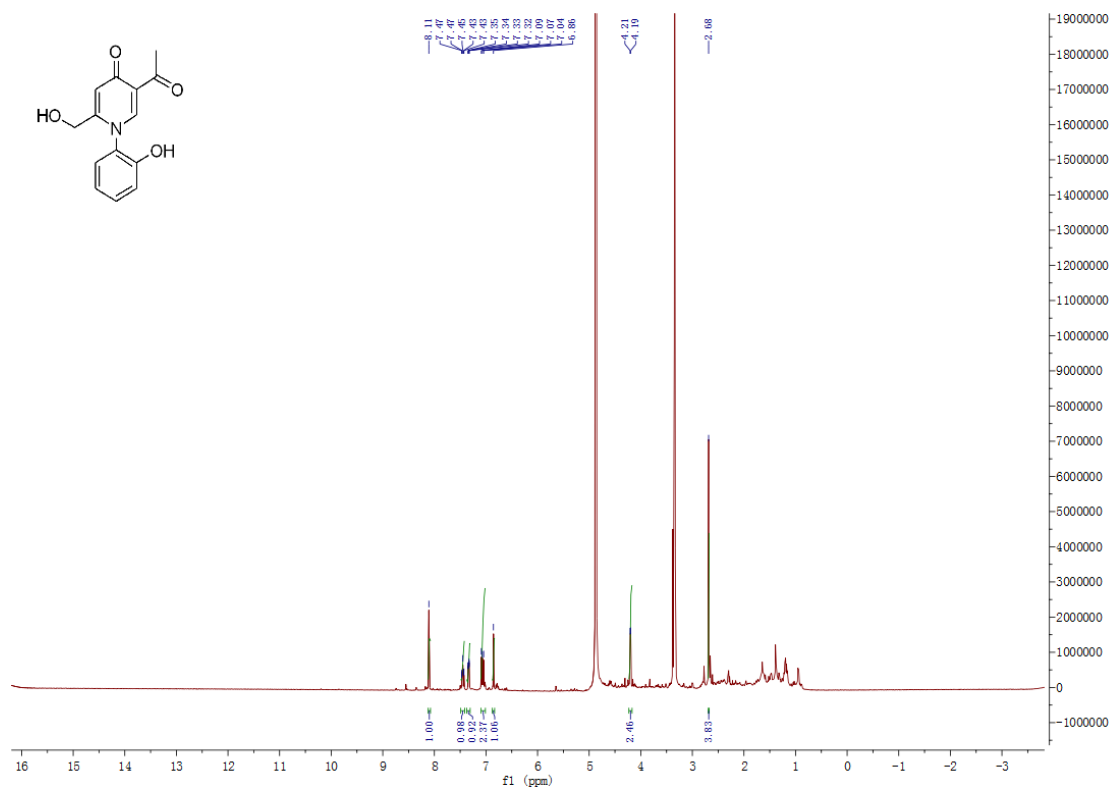

Figure S3.  $^1\text{H}$  NMR (400 MHz,  $\text{CD}_3\text{OD}$ ) spectrum of compound **1**

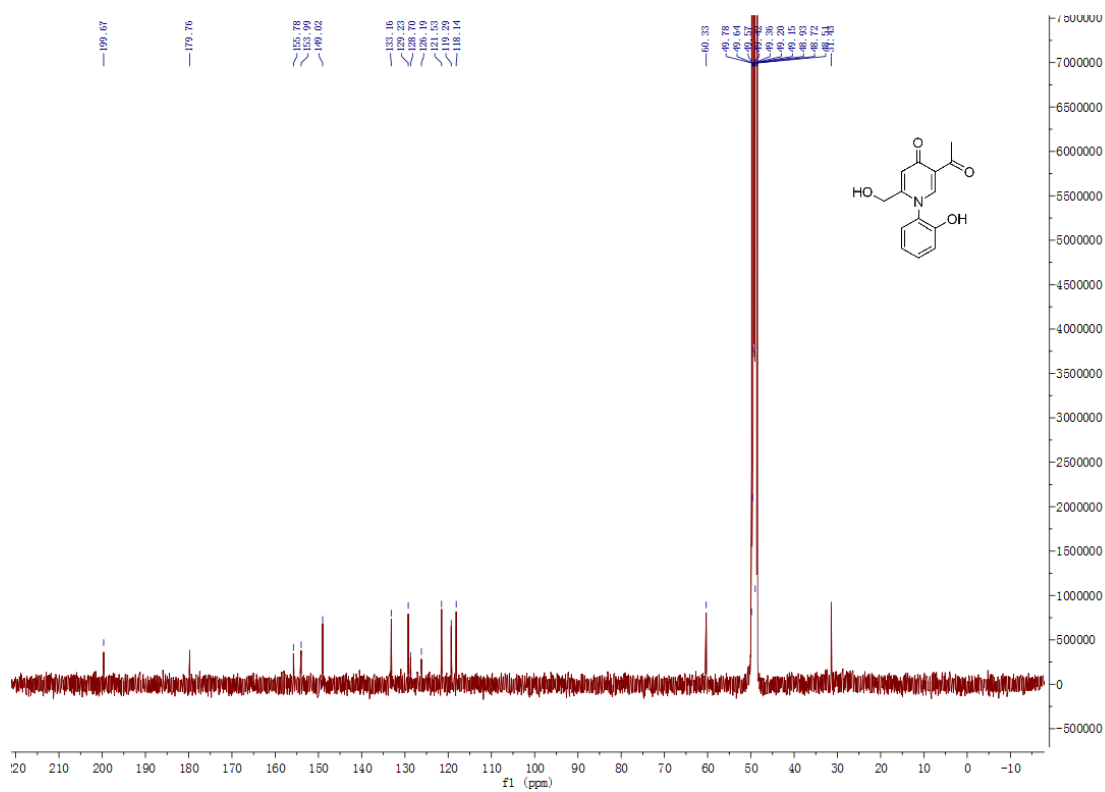

Figure S4.  $^{13}\text{C}$  NMR (400 MHz,  $\text{CD}_3\text{OD}$ ) spectrum of compound **1**

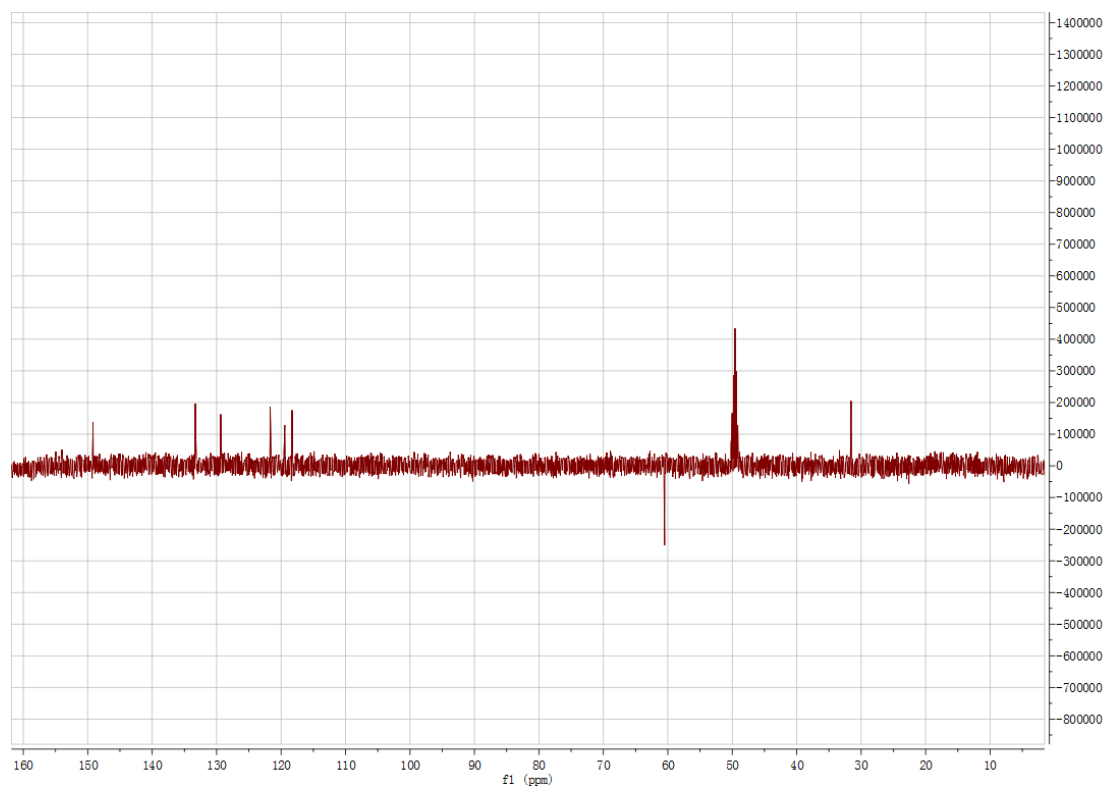

Figure S5. DEPT135 NMR (400 MHz,  $\text{CD}_3\text{OD}$ ) spectrum of compound **1**

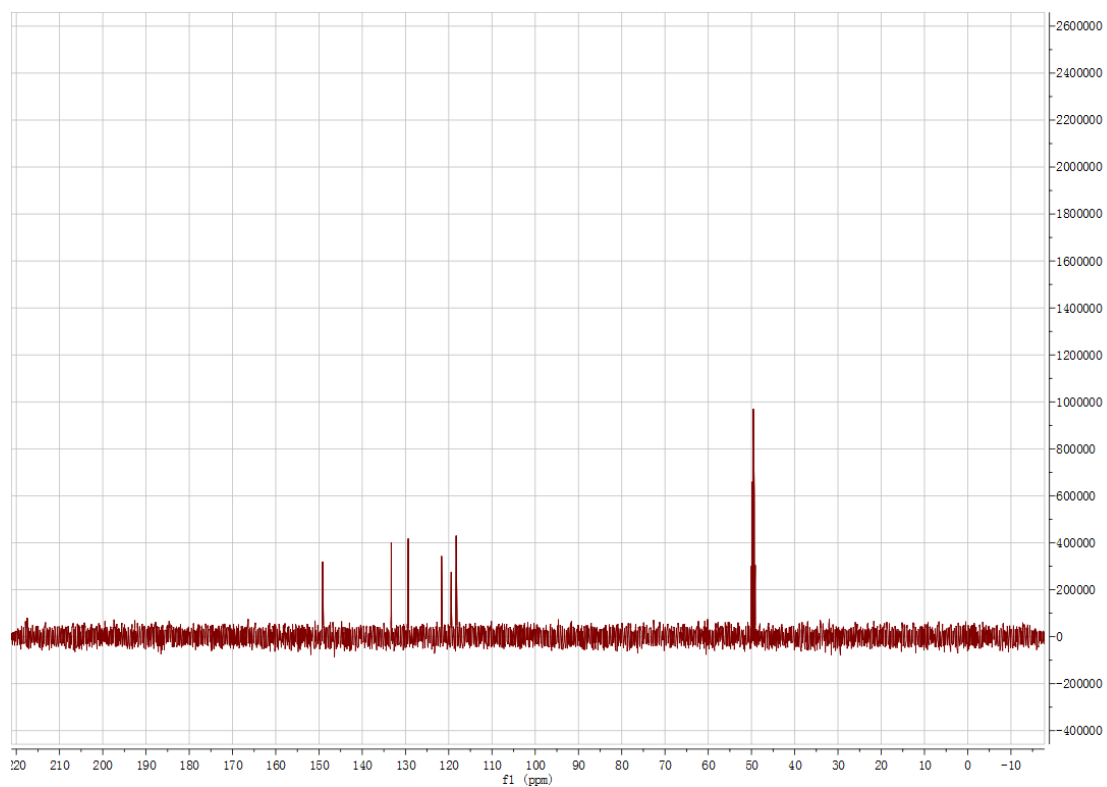

Figure S6. DEPT90 NMR (400 MHz, CD<sub>3</sub>OD) spectrum of compound **1**

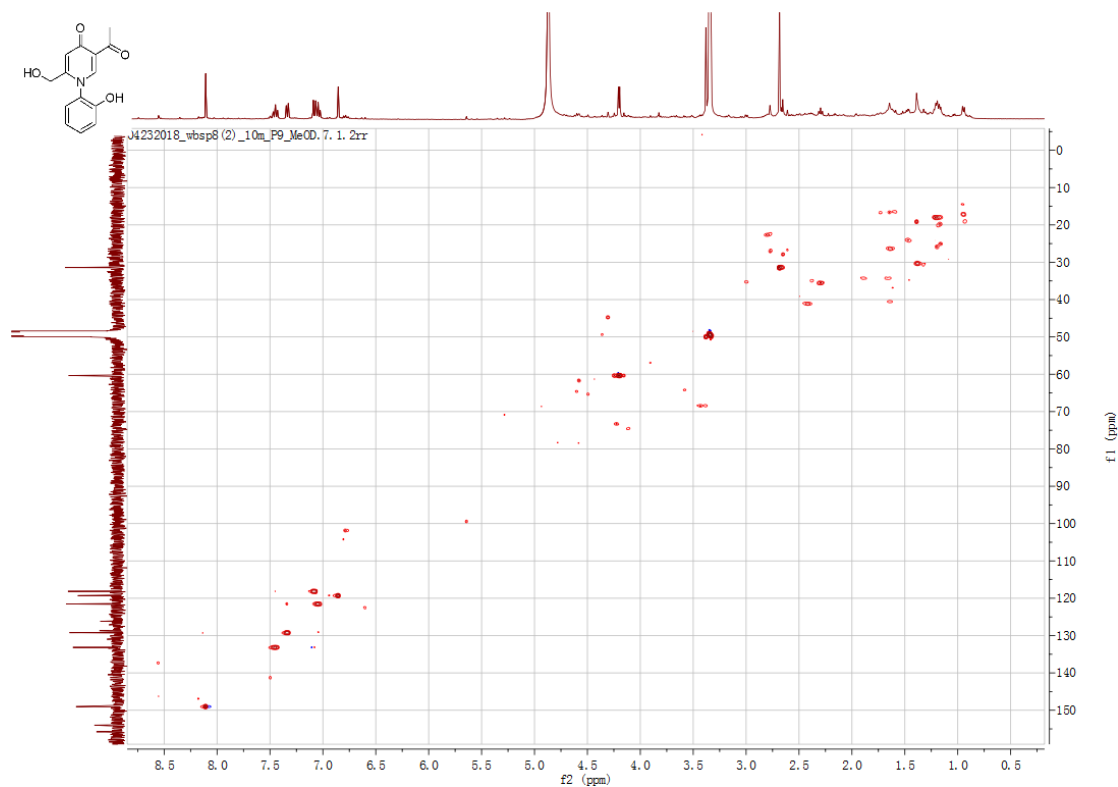

Figure S7. <sup>1</sup>H-<sup>13</sup>C HSQC spectrum of compound **1** (400 MHz, CD<sub>3</sub>OD)

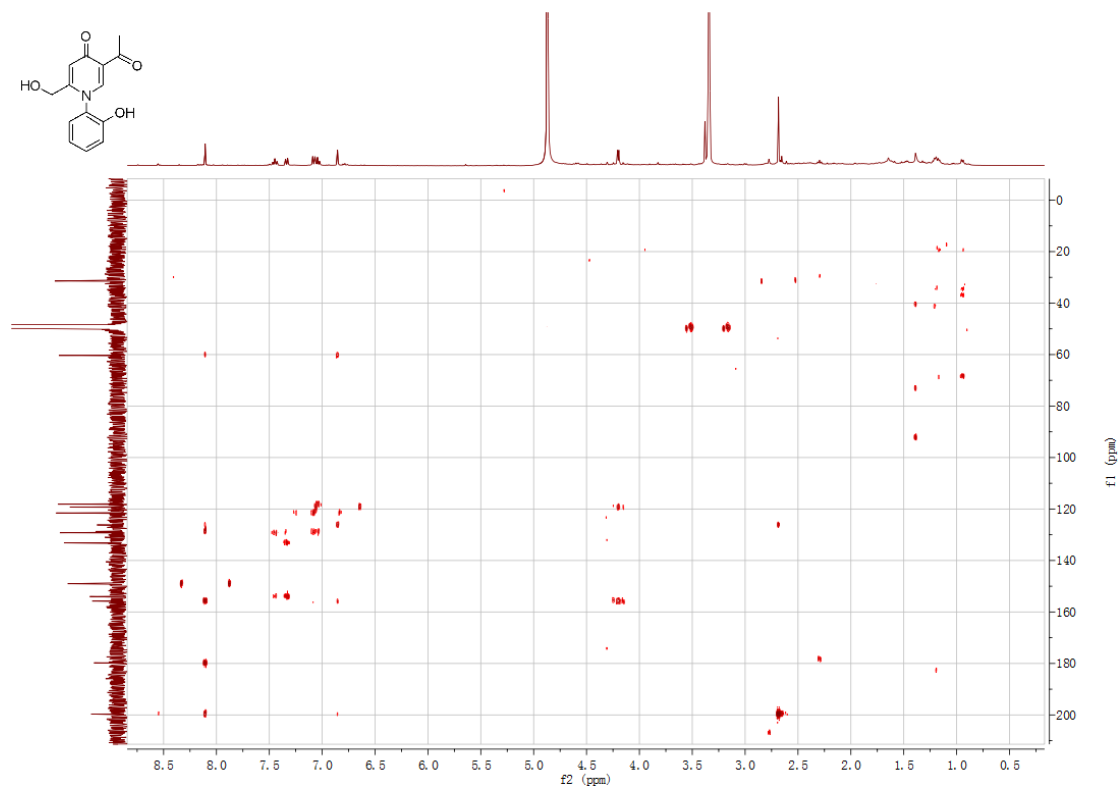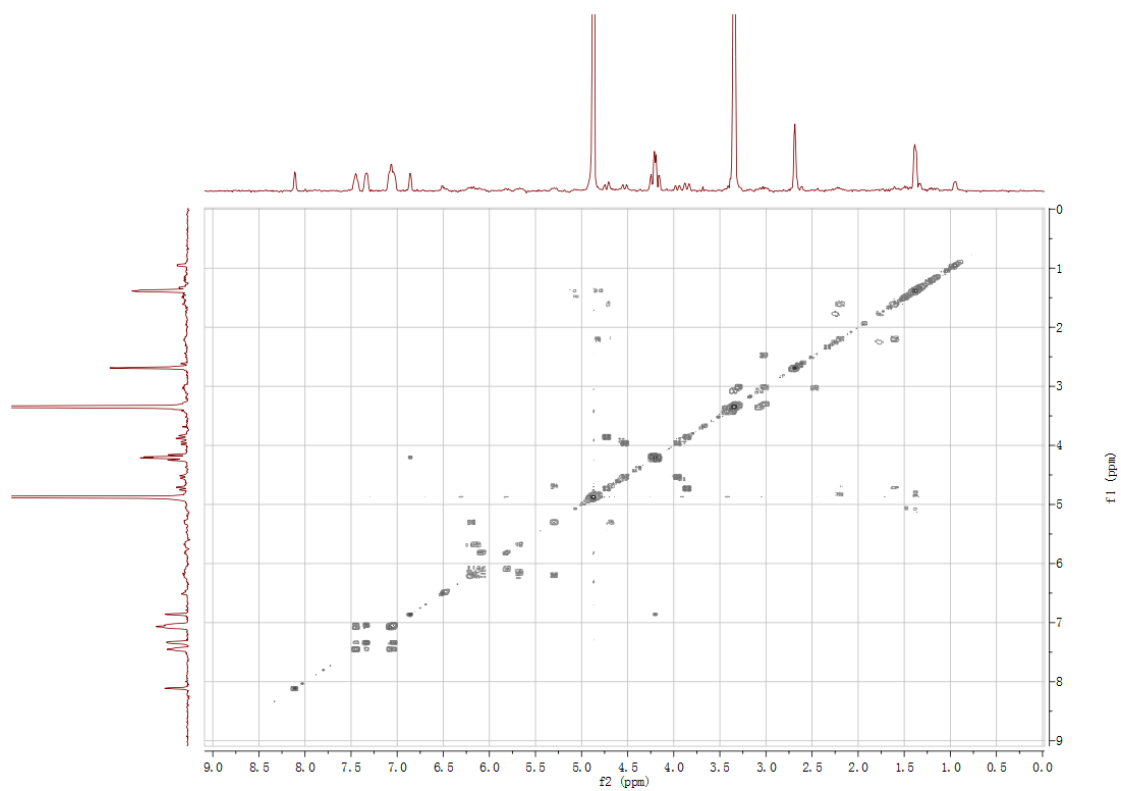

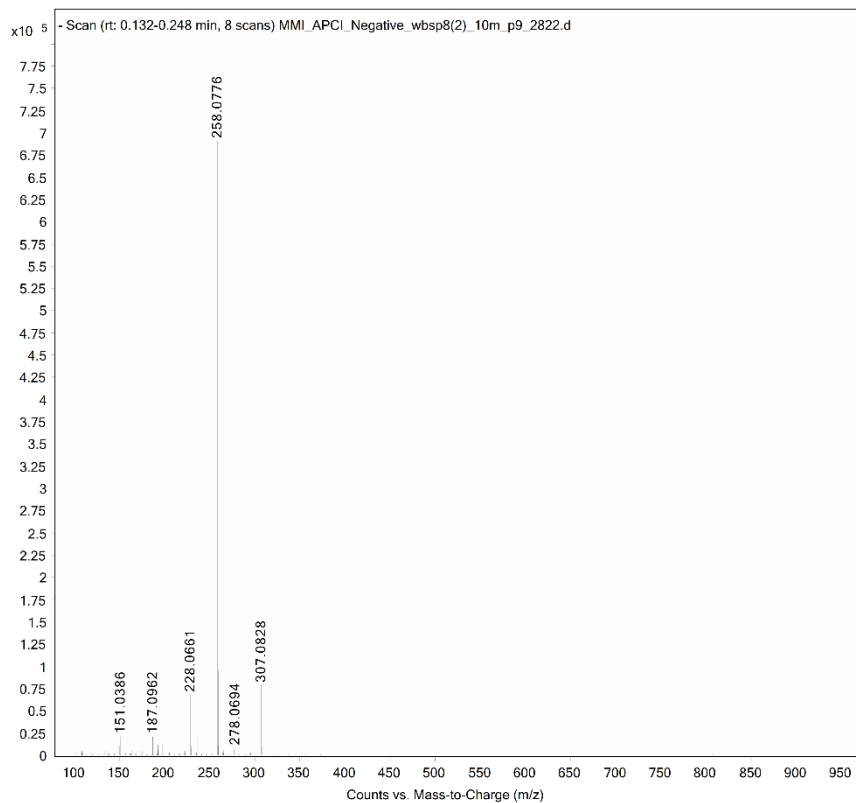

Figure S10. HRTOFMS spectrum of compound **1**

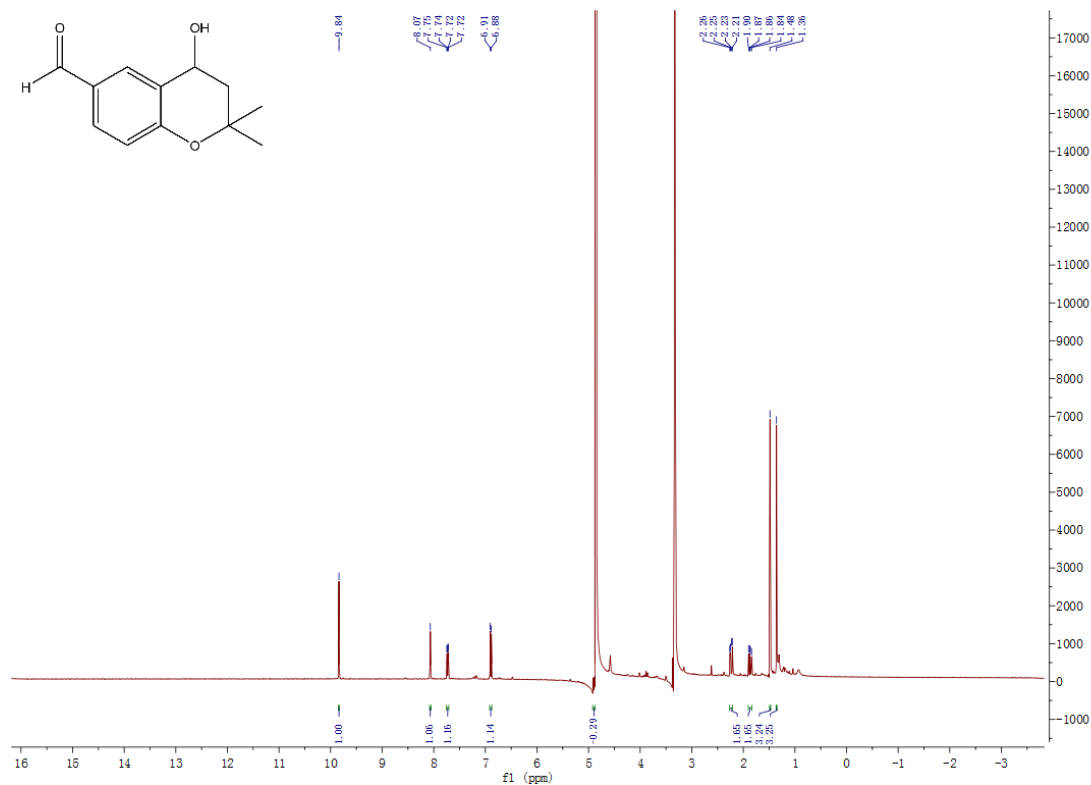

Figure S11. <sup>1</sup>H NMR (400 MHz, CD<sub>3</sub>OD) spectrum of compound **2**

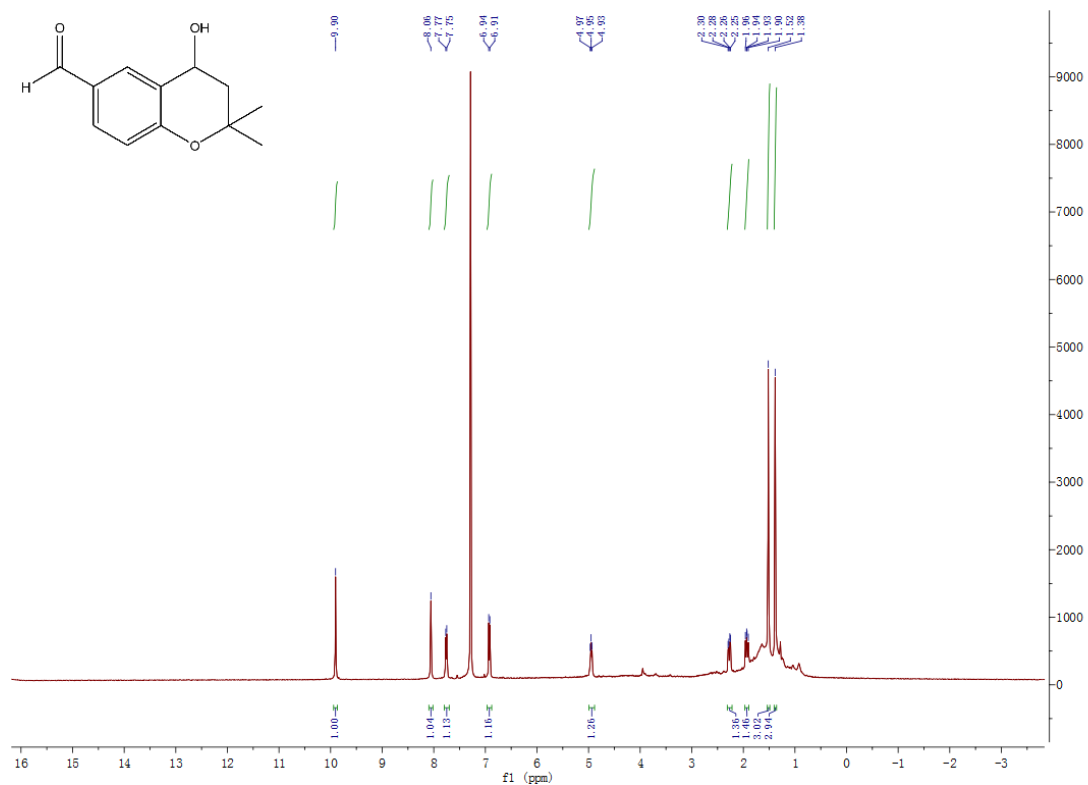

Figure S12. <sup>1</sup>H NMR (400 MHz, CD<sub>3</sub>Cl<sub>3</sub>) spectrum of compound 2

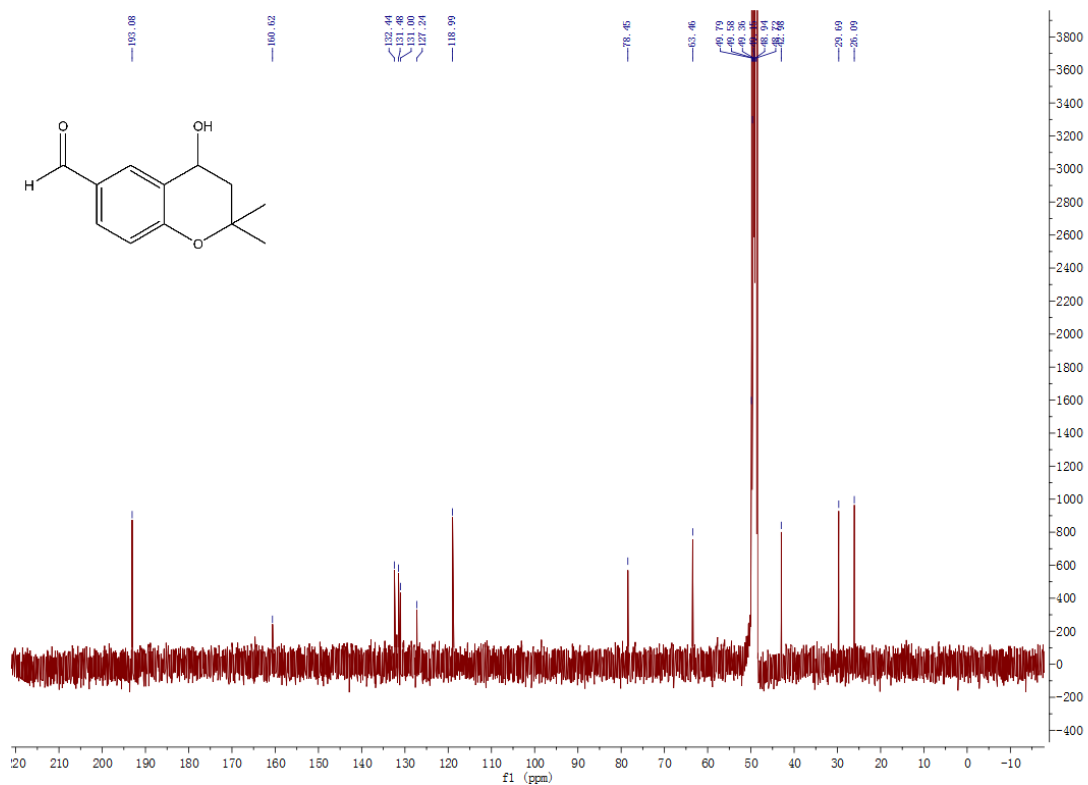

Figure S13. <sup>13</sup>C NMR (400 MHz, CD<sub>3</sub>OD) spectrum of compound 2

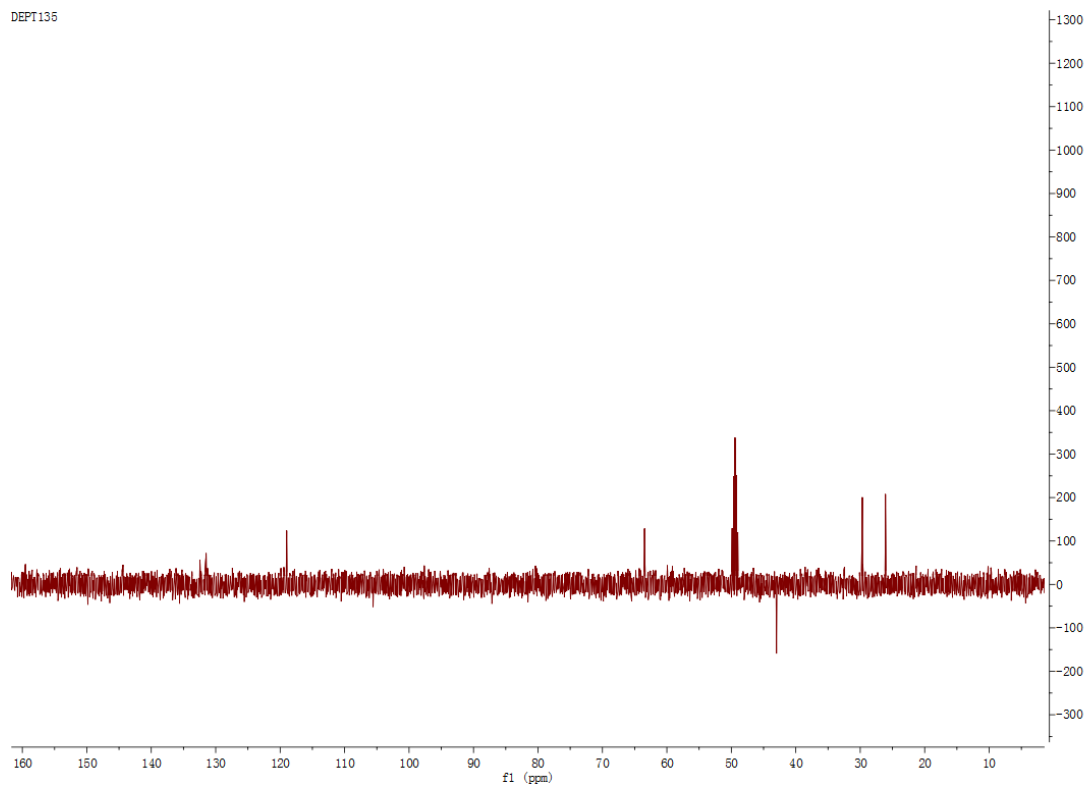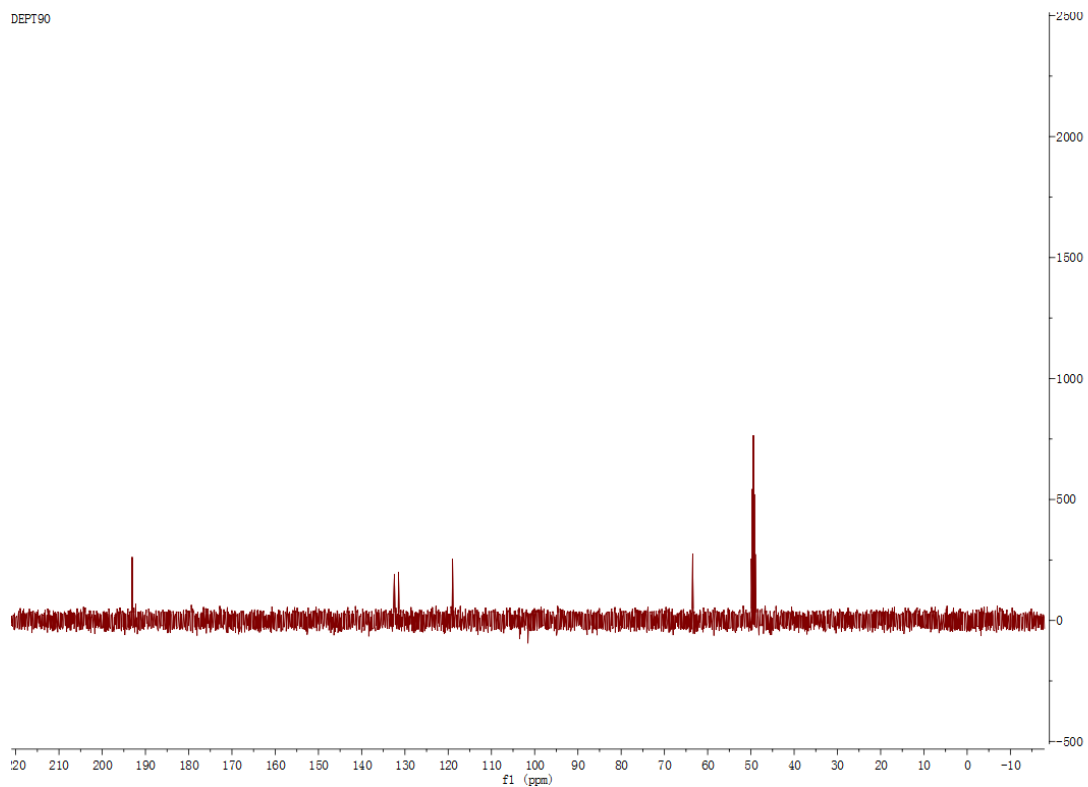



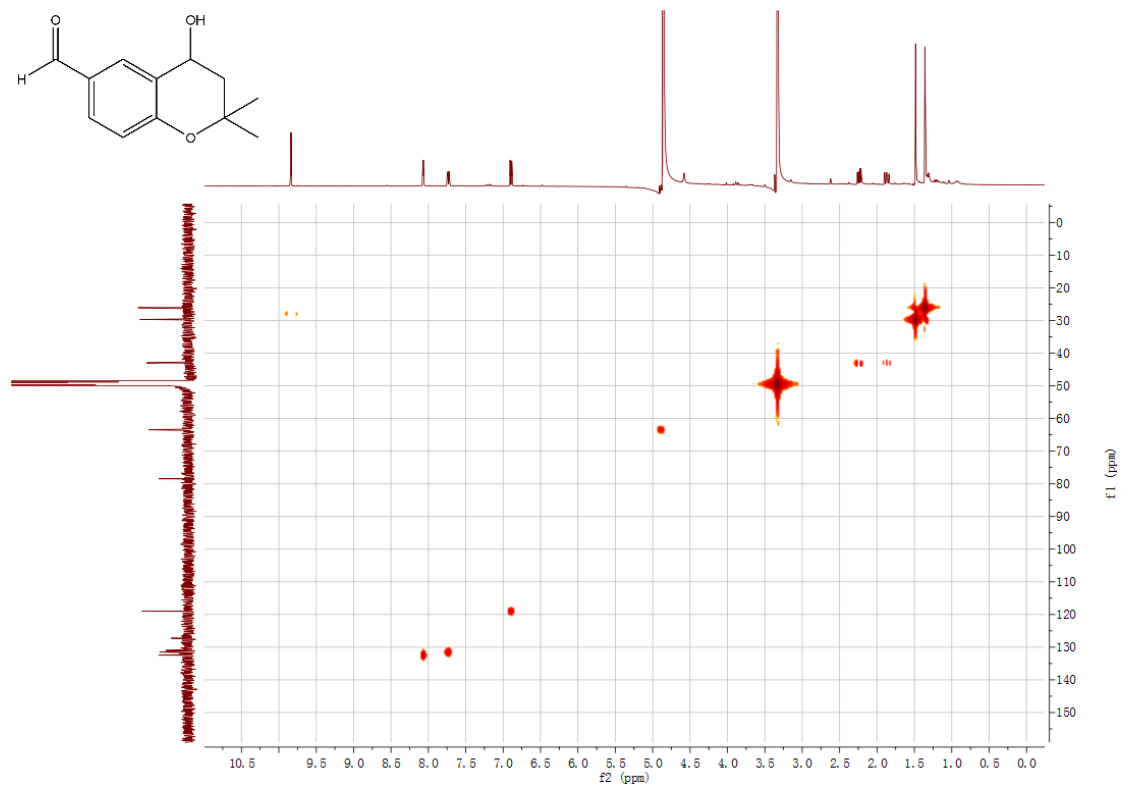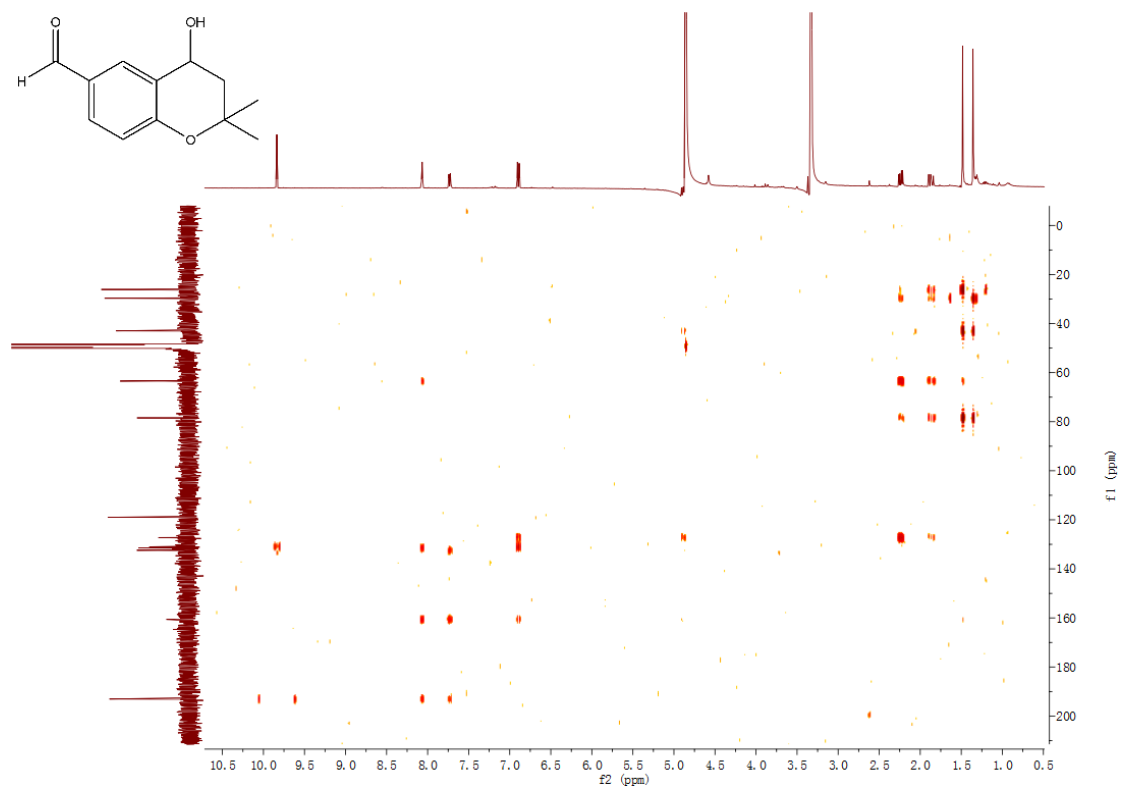

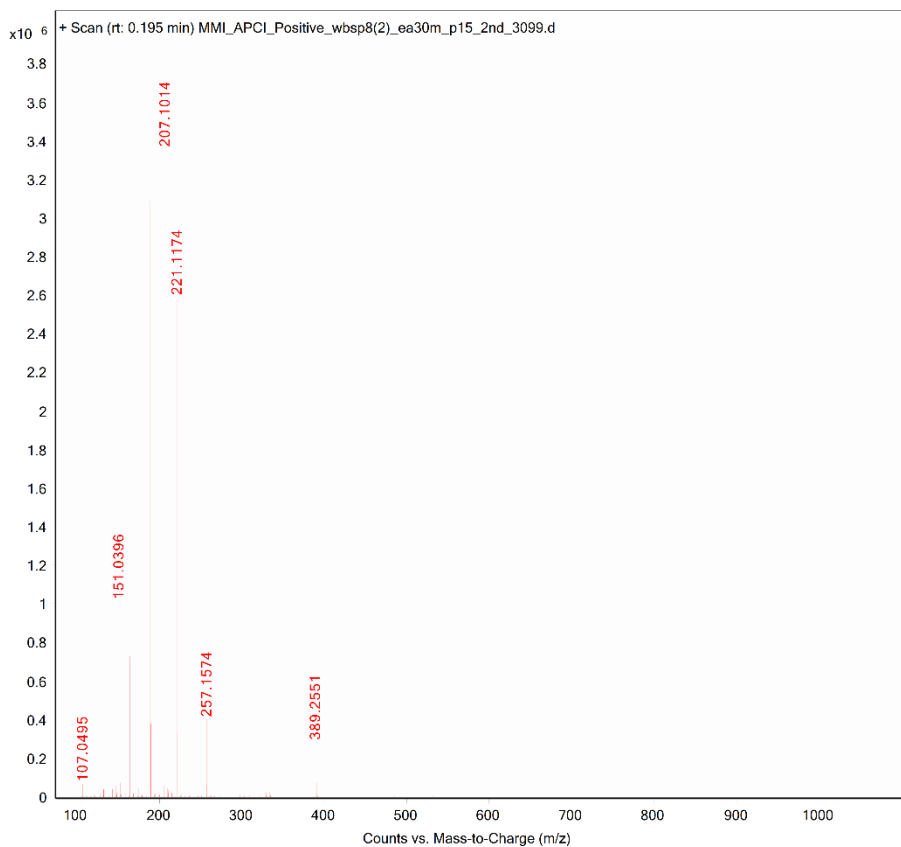

Figure S18. HRTOFMS spectrum of compound **2**

**Table S1.** Optical rotation data of compound **2** and similar compounds

| Compound                                                                      | Structure | Solvent        | $[\alpha]_D^{25}$<br>(degree) |
|-------------------------------------------------------------------------------|-----------|----------------|-------------------------------|
| ( <i>S</i> )-1-(4-hydroxy-2,2-dimethylchroman-6-yl)ethan-1-one <sup>[1]</sup> |           | c = 0.26, MeOH | +68.6                         |
| ( <i>R</i> )-1-(4-hydroxy-2,2-dimethylchroman-6-yl)ethan-1-one <sup>[1]</sup> |           | c = 0.25, MeOH | -79.8                         |
| Compound <b>2</b>                                                             |           | c = 0.12, MeOH | +10.0                         |

<sup>[1]</sup> Sun *et al.*, Chromane Enantiomers from the Flower Buds of *Tussilago farfara* L. and Assignments of Their Absolute Configurations. *Chem. Biodiversity* 2019, 16, e1800581

**Table S2.** MS, <sup>1</sup>H and <sup>13</sup>C NMR Data of Known Compounds

| Compounds                                               | MS and NMR data                                                                                                                                                                                                                                                                                                                                                                                                                                                                                                                                                                                                                                                                                                     |
|---------------------------------------------------------|---------------------------------------------------------------------------------------------------------------------------------------------------------------------------------------------------------------------------------------------------------------------------------------------------------------------------------------------------------------------------------------------------------------------------------------------------------------------------------------------------------------------------------------------------------------------------------------------------------------------------------------------------------------------------------------------------------------------|
| 4-chloro-3,5-dimethoxy benzaldehyde (3)                 | HR-MS (APCI <sup>+</sup> ): m/z 218.0657 [M+NH <sub>4</sub> ] <sup>+</sup> . <sup>1</sup> H NMR (400 MHz, CDCl <sub>3</sub> ) δ 9.93 (s, 1H), 7.12 (s, 2H), 3.99 (s, 6H). <sup>13</sup> C NMR (101 MHz, CDCl <sub>3</sub> ) δ 191.32, 157.13, 135.53, 117.71, 105.68, 56.98.                                                                                                                                                                                                                                                                                                                                                                                                                                        |
| 2-chloro-1,3-dimethoxy-5-methylbenzene (4)              | HR-MS (APCI <sup>+</sup> ): m/z 187.0516 [M+H] <sup>+</sup> . <sup>1</sup> H NMR (400 MHz, CDCl <sub>3</sub> ) δ 6.40 (s, 2H), 3.86 (s, 6H), 2.32 (s, 3H). <sup>13</sup> C NMR (101 MHz, CDCl <sub>3</sub> ) δ 156.03, 137.80, 107.76, 105.87, 56.50, 22.24.                                                                                                                                                                                                                                                                                                                                                                                                                                                        |
| (4-chloro-3,5-dimethoxy phenyl) methanol (5)            | HR-MS (APCI): m/z 201.0353 [M-H] <sup>-</sup> . <sup>1</sup> H NMR (400 MHz, CDCl <sub>3</sub> ) δ 6.63 (s, 2H), 4.69 (s, 2H), 3.91 (s, 6H). <sup>13</sup> C NMR (101 MHz, CDCl <sub>3</sub> ) δ 156.57, 140.84, 109.98, 103.37, 65.59, 56.74.                                                                                                                                                                                                                                                                                                                                                                                                                                                                      |
| 3,6-bis(hydroxymethyl)-2-methyl-4H-pyran-4-one (6)      | HR-MS (APCI): m/z 215.0118 [M-H] <sup>-</sup> . <sup>1</sup> H NMR (400 MHz, CD <sub>3</sub> OD) δ 7.46 (s, 2H), 3.97 (s, 6H). <sup>13</sup> C NMR (101 MHz, CD <sub>3</sub> OD) δ 171.18, 157.69, 130.98, 111.55, 106.96, 57.15.                                                                                                                                                                                                                                                                                                                                                                                                                                                                                   |
| 4-chloro-3,5-dimethoxy benzoic acid (7)                 | HR-MS (APCI <sup>+</sup> ): m/z 171.0651 [M+H] <sup>+</sup> . <sup>1</sup> H NMR (400 MHz, CD <sub>3</sub> OD) δ 6.42 (s, 1H), 4.52 (s, 2H), 4.43 (s, 2H), 2.47 (s, 3H). <sup>13</sup> C NMR (101 MHz, CD <sub>3</sub> OD) δ 181.53, 170.71, 167.96, 124.87, 111.76, 61.24, 55.11, 17.57.                                                                                                                                                                                                                                                                                                                                                                                                                           |
| 5-hydroxy-6-(1-hydroxyethyl)isobenzofuran-1(3H)-one (8) | HR-MS (APCI <sup>+</sup> ): m/z 195.0651 [M+H] <sup>+</sup> . <sup>1</sup> H NMR (400 MHz, CD <sub>3</sub> OD) δ 7.89 (s, 1H), 6.93 (s, 1H), 5.28 (s, 2H), 5.18 (q, J = 6.4 Hz, 1H), 1.46 (d, J = 6.4 Hz, 3H). <sup>13</sup> C NMR (101 MHz, CD <sub>3</sub> OD) δ 174.10, 161.98, 150.07, 136.79, 124.05, 117.34, 108.86, 70.83, 66.19, 24.13.                                                                                                                                                                                                                                                                                                                                                                     |
| Erinacines E (9)                                        | [α] <sup>18</sup> D: -144 (c 0.50, MeOH). HR-MS (APCI): m/z 431.2439 [M-H] <sup>-</sup> . <sup>1</sup> H NMR (400 MHz, CD <sub>3</sub> OD) δ 5.63(m,1H), 4.96 (s,1H), 4.72(br.s, 1H), 4.23(d, J= 6.23, 1H), 3.93 (d,J=12.28, 1H), 3.92(s, 1H), 3.24(d, J=12.28,1H), 3.13(m, 1H),2.96(qq, J=6.60, 6.96,1H), 2.88(br.d, J=12.46, 1H), 2.68(m, 1H), 2.62(m, 1H) 2.32(m, 2H), 1.70(m, 1H), 1.55(m, 3H), 1.31(m, 1H), 1.11(s, 3H), 1.02(d, J=6.96, 3H), 1.00(d, J=6.96, 3H), 0.98(s, 3H). <sup>13</sup> C NMR (101 MHz, CD <sub>3</sub> OD) δ 142.74, 140.34, 138.89, 124.19, 106.65, 97.65, 80.36, 76.05, 75.08, 72.38, 66.74, 51.0,44.44, 44.14, 42.43, 40.29, 38.32, 32.11, 29.38, 28.69, 28.32, 25.20, 22.26, 17.54. |
